# Supplementary material
Source: MDPI journal article supplement (https://www.mdpi.com/2410-3888/7/4/171)
Supplement: s1 [file s1]

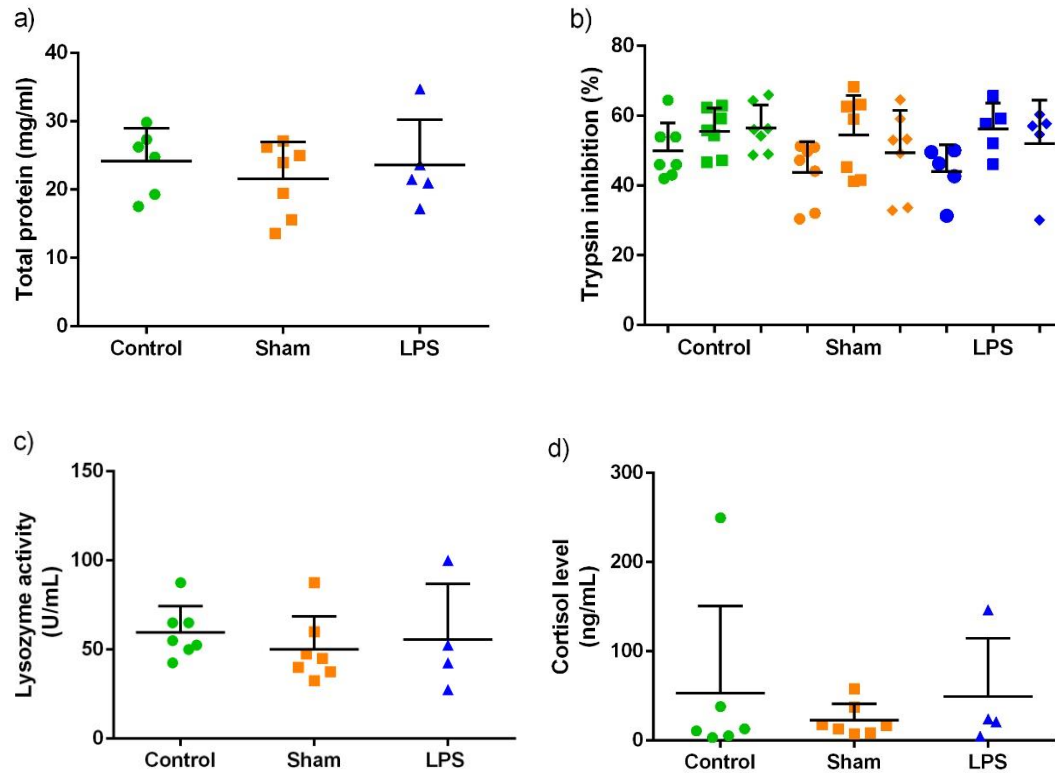

Figure S1. Biochemical analysis parameters in blood plasma. Total protein (A, mg/ml), trypsin inhibition (B, %), lysozyme (C, U/ml) and cortisol (D, ng/ml) in control-non injected (green), sham-injected (orange) and LPS-injected (blue). The geometric symbols represent different incubation temperatures during the assay, circles -37°C, squares- 21°C and lozenges- 4°C. No statistically significant differences (one-way ANOVA,  $p = ns$ ).
